# Supplementary material for: Hundreds of myosin 10s are pushed to the tips of filopodia and could cause traffic jams on actin
Source: eLife. 2024 Oct 31;12:RP90603. doi: 10.7554/eLife.90603 (PMC11527427; doi:10.7554/eLife.90603)
Supplement: Figure 2—source data 1. [file elife-90603-fig2-data1.xlsx]

## Sheet: Sheet1
Cell	sumFLP	Set	n_filopodia	body	total
1	467932	1	52	2491914	2959846
2	3867873	1	64	99751028	103618901
3	206907	1	40	4071141	4278048
4	72965	1	12	2965252	3038217
6	183388	1	49	4778007	4961395
7	689601	1	51	12059968	12749569
8	1065701	1	63	11293062	12358763
9	322096	1	49	4029995	4352091
10	1468087	1	68	7884244	9352331
11	2110233	1	47	59627802	61738035
12	836608	1	48	18088742	18925350
13	677765	1	45	3258059	3935824
14	113032	1	36	1773205	1886237
15	3018014	1	59	54020384	57038398
16	5859481	1	116	63869276	69728757
17	453804	1	52	8433153	8886957
19	117901	1	34	4811280	4929181
20	135832	1	36	1227768	1363600
21	256316	1	58	7394284	7650600
22	383242	1	59	4179546	4562788
24	314173	1	62	8371987	8686160
25	635600	1	51	12660774	13296374
26	135398	1	26	3669671	3805069
27	1380495	1	71	27417804	28798299
28	85526	1	30	2327200	2412726
29	51972	1	20	1043472	1095444
30	468635	1	52	7010235	7478870
31	1358798	1	49	87958372	89317170
32	165119	1	38	1758572	1923691
33	135403	1	23	1987967	2123370
34	46790	1	22	2417692	2464482
35	213725	1	50	2119549	2333274
36	1881759	1	69	54411859	56293618
37	1234876	1	56	10890544	12125420
38	39331	1	20	826960	866291
39	913547	1	42	6182419	7095966
40	94536	1	29	2288047	2382583
41	159042	1	41	1415867	1574909
42	740681	1	73	16279764	17020445
43	694714	1	58	7246340	7941054
44	315581	1	48	1858353	2173934
45	317056	1	57	6838482	7155538
47	138540	1	41	3178539	3317079
48	1196552	1	46	11510576	12707128
49	714625	1	40	9209725	9924350
50	1148544	1	56	25438765	26587309
51	7570193	1	41	137014456	144584649
52	178718	1	36	1205434	1384152
53	986912	1	44	41249850	42236762
54	1188174	1	72	14151547	15339721
55	335790	1	24	11340733	11676523
1	1143301	2	62	30479623	31622924
2	155862	2	42	1649890	1805752
3	1669103	2	64	33129579	34798682
4	541862	2	44	10127434	10669296
5	1886564	2	105	16600561	18487125
6	2158791	2	28	138314126	140472917
7	786931	2	54	7778524	8565455
8	1.55604e+06	2	78	75494497	7.70505e+07
9	642928	2	74	9241433	9884361
10	174657	2	34	5040135	5214792
11	358110	2	44	8911209	9269319
12	2608631	2	52	31168389	33777020
13	741251	2	41	9806959	10548210
14	925219	2	59	38757477	3.96827e+07
15	1514782	2	99	15276772	16791554
16	431437	2	65	5682557	6113994
17	1261788	2	84	5385584	6647372
18	2215082	2	79	34776749	36991831
19	340826	2	42	21927026	22267852
20	694843	2	89	8423182	9118025
21	1805966	2	55	63813223	65619189
22	623318	2	52	7494334	8117652
23	360099	2	52	5333521	5693620
24	150263	2	40	2895562	3045825
25	2260908	2	87	55301263	57562171
26	1106245	2	39	42295589	43401834
27	1795835	2	107	16222127	18017962
28	586227	2	53	3283214	3869441
29	1226590	2	85	32177115	33403705
30	70896	2	24	3792311	3863207
31	233118	2	53	4714859	4947977
32	1219943	2	54	16878562	18098505
33	83603	2	23	1400842	1484445
34	603451	2	67	7161502	7764953
35	2.67649e+06	2	59	14233924	1.69104e+07
36	2250329	2	116	20760981	23011310
37	845400	2	63	7400732	8246132
38	1305095	2	70	22260496	23565591
39	732737	2	53	18272869	19005606
40	103155	2	32	977017	1080172
41	1298704	2	69	12341874	13640578
42	1330376	2	67	24161978	25492354
43	413360	2	44	4398149	4811509
44	614953	2	52	4655367	5270320
45	1639507	2	89	46025835	47665342
46	399733	2	78	13443191	13842924
47	889519	2	68	8776618	9666137
48	3103515	2	94	12518190	15621705
49	387795	2	57	3977461	4365256
50	2188444	2	66	23259823	25448267
1	1035216	3	82	10963112	11998328
2	345138	3	66	4749284	5094422
3	1269571	3	63	16960748	18230319
4	183864	3	37	3426697	3610561
5	3336625	3	101	101270838	104607463
6	124582	3	39	6575539	6700121
7	2.30545e+06	3	90	51440363	5.37458e+07
9	2701309	3	106	35317528	38018837
10	4665820	3	72	54244430	58910250
11	4.99352e+06	3	75	119908079	1.24902e+08
12	1482102	3	87	51790547	53272649
13	1459192	3	99	26044565	27503757
15	2570556	3	65	40483651	43054207
16	2.93598e+06	3	89	69331761	7.22677e+07
17	4650083	3	66	105962361	110612444
18	1008703	3	87	10213412	11222115
19	1908221	3	45	13988664	15896885
21	162161	3	34	3198485	3360646
22	482453	3	38	45402005	45884458
23	2357607	3	62	21835861	24193468
24	447366	3	52	4898110	5345476
25	154297	3	30	5335365	5489662
26	84063	3	31	2309177	2393240
27	3100288	3	41	18326455	21426743
28	2075998	3	76	9075724	11151722
30	218475	3	43	2184931	2403406
31	3581390	3	81	121813362	125394752
32	180437	3	29	4519636	4700073
33	504712	3	67	6003215	6507927
34	175207	3	34	2115017	2290224
35	1775182	3	84	34919024	36694206
36	1414965	3	70	28954620	30369585
37	91025	3	30	3214194	3305219
38	2391294	3	97	17672912	20064206
39	1861502	3	78	16377908	18239410
40	1857587	3	80	54266702	56124289
41	1728986	3	79	12695121	14424107
42	1391038	3	74	18182033	19573071
43	1542752	3	75	33561736	35104488
44	2496458	3	71	61216684	63713142
45	1073471	3	43	34197422	35270893
46	1741696	3	70	37151273	38892969
47	1891099	3	110	13621591	15512690
48	20657	3	21	2382147	2402804
49	644855	3	78	8818209	9463064
50	985520	3	74	16928386	17913906
51	1586100	3	87	28780458	30366558
52	256130	3	48	8021559	8277689
53	2757796	3	45	253180185	255937981
