# Supplementary material for: Hundreds of myosin 10s are pushed to the tips of filopodia and could cause traffic jams on actin
Source: eLife. 2024 Oct 31;12:RP90603. doi: 10.7554/eLife.90603 (PMC11527427; doi:10.7554/eLife.90603)
Supplement: Figure 3—source data 1. [file elife-90603-fig3-data1.xlsx]

## Sheet: Sheet1
Set	Cell	FLP_Signal
1	1	16650
1	1	12132
1	1	6888
1	1	19291
1	1	250
1	1	5495
1	1	864
1	1	5190
1	1	8453
1	1	780
1	1	12057
1	1	542
1	1	14450
1	1	1620
1	1	1290
1	1	15673
1	1	8875
1	1	1477
1	1	12756
1	1	1469
1	1	5275
1	1	4210
1	1	18476
1	1	2906
1	1	5852
1	1	3502
1	1	1762
1	1	12719
1	1	3211
1	1	5622
1	1	1250
1	1	3213
1	1	17961
1	1	6246
1	1	16458
1	1	3924
1	1	14014
1	1	5588
1	1	3272
1	1	1159
1	1	703
1	1	3412
1	1	5571
1	1	2548
1	1	27416
1	1	27734
1	1	11508
1	1	2198
1	1	7688
1	1	8674
1	1	3731
1	1	83927
1	2	39364
1	2	54762
1	2	1373
1	2	287680
1	2	6840
1	2	17018
1	2	5528
1	2	3075
1	2	17773
1	2	20381
1	2	95351
1	2	17157
1	2	13921
1	2	15558
1	2	13036
1	2	21341
1	2	11109
1	2	17092
1	2	18151
1	2	22949
1	2	33279
1	2	95795
1	2	30876
1	2	9806
1	2	76258
1	2	11185
1	2	69272
1	2	9959
1	2	5443
1	2	6715
1	2	35574
1	2	4552
1	2	3998
1	2	26685
1	2	4883
1	2	6458
1	2	96804
1	2	23913
1	2	36946
1	2	12976
1	2	13416
1	2	43257
1	2	59463
1	2	84107
1	2	11398
1	2	24823
1	2	10391
1	2	22284
1	2	14305
1	2	8565
1	2	10342
1	2	22969
1	2	50256
1	2	28916
1	2	20791
1	2	116061
1	2	31005
1	2	13875
1	2	31339
1	2	4565
1	2	7218
1	2	82336
1	2	1755167
1	2	100188
1	3	5345
1	3	6299
1	3	365
1	3	684
1	3	3525
1	3	4318
1	3	21425
1	3	4609
1	3	3278
1	3	1666
1	3	11311
1	3	9972
1	3	2383
1	3	2633
1	3	2033
1	3	2548
1	3	2273
1	3	8309
1	3	544
1	3	2278
1	3	388
1	3	4362
1	3	8113
1	3	819
1	3	249
1	3	3474
1	3	952
1	3	5851
1	3	5807
1	3	934
1	3	4914
1	3	6018
1	3	5792
1	3	3255
1	3	6700
1	3	4306
1	3	401
1	3	18149
1	3	11682
1	3	18943
1	4	2041
1	4	3833
1	4	722
1	4	19363
1	4	4983
1	4	2048
1	4	6082
1	4	7481
1	4	1209
1	4	1546
1	4	12868
1	4	10789
1	6	943
1	6	1446
1	6	893
1	6	920
1	6	1117
1	6	875
1	6	1909
1	6	538
1	6	496
1	6	1240
1	6	830
1	6	3491
1	6	6057
1	6	11051
1	6	841
1	6	504
1	6	3264
1	6	11693
1	6	3476
1	6	2284
1	6	1137
1	6	1885
1	6	1325
1	6	729
1	6	6588
1	6	791
1	6	4270
1	6	2941
1	6	1911
1	6	2735
1	6	4002
1	6	805
1	6	4336
1	6	3555
1	6	754
1	6	3424
1	6	2231
1	6	859
1	6	2903
1	6	3960
1	6	954
1	6	7072
1	6	6886
1	6	2386
1	6	2591
1	6	22164
1	6	7574
1	6	13220
1	6	15532
1	7	13257
1	7	3884
1	7	33014
1	7	11388
1	7	2056
1	7	1245
1	7	2533
1	7	2857
1	7	14288
1	7	32895
1	7	1814
1	7	25391
1	7	8267
1	7	14440
1	7	26433
1	7	1209
1	7	2345
1	7	6427
1	7	1252
1	7	33415
1	7	4048
1	7	5358
1	7	19796
1	7	49568
1	7	1545
1	7	15805
1	7	5686
1	7	1692
1	7	49236
1	7	2176
1	7	20325
1	7	7707
1	7	22545
1	7	7939
1	7	27561
1	7	33737
1	7	1846
1	7	9887
1	7	4581
1	7	4554
1	7	6960
1	7	24614
1	7	6391
1	7	38206
1	7	3455
1	7	6239
1	7	13433
1	7	21336
1	7	4000
1	7	10755
1	7	20210
1	8	32041
1	8	18248
1	8	20488
1	8	16273
1	8	4940
1	8	35181
1	8	11812
1	8	1543
1	8	3846
1	8	8443
1	8	266
1	8	7474
1	8	984
1	8	15330
1	8	4137
1	8	1200
1	8	16553
1	8	26606
1	8	23970
1	8	2734
1	8	2304
1	8	18932
1	8	7180
1	8	51555
1	8	1619
1	8	14559
1	8	295
1	8	37253
1	8	14783
1	8	2770
1	8	5686
1	8	4883
1	8	11120
1	8	7149
1	8	9382
1	8	19643
1	8	16889
1	8	17553
1	8	15562
1	8	3396
1	8	30399
1	8	44072
1	8	87936
1	8	18850
1	8	50546
1	8	21534
1	8	22854
1	8	11427
1	8	9489
1	8	13885
1	8	7101
1	8	19474
1	8	29494
1	8	10917
1	8	23488
1	8	26452
1	8	8990
1	8	16387
1	8	12179
1	8	20087
1	8	5111
1	8	1995
1	8	58452
1	9	7025
1	9	5667
1	9	727
1	9	47534
1	9	843
1	9	1578
1	9	9898
1	9	589
1	9	1152
1	9	3347
1	9	5672
1	9	2088
1	9	4712
1	9	5428
1	9	5948
1	9	4609
1	9	632
1	9	11639
1	9	5084
1	9	781
1	9	5290
1	9	6065
1	9	2247
1	9	5310
1	9	7204
1	9	8297
1	9	944
1	9	1450
1	9	3861
1	9	7412
1	9	2422
1	9	536
1	9	1230
1	9	2162
1	9	3113
1	9	18179
1	9	10169
1	9	897
1	9	895
1	9	6726
1	9	5653
1	9	7033
1	9	20967
1	9	18122
1	9	7394
1	9	10943
1	9	5534
1	9	11068
1	9	16020
1	10	120221
1	10	264
1	10	19535
1	10	42026
1	10	106741
1	10	20300
1	10	47184
1	10	518
1	10	12661
1	10	23182
1	10	2924
1	10	893
1	10	2383
1	10	1792
1	10	254
1	10	35698
1	10	14326
1	10	567
1	10	2698
1	10	3699
1	10	15796
1	10	260
1	10	300
1	10	46887
1	10	17004
1	10	2205
1	10	8310
1	10	8576
1	10	7802
1	10	17785
1	10	25212
1	10	42863
1	10	873
1	10	917
1	10	1189
1	10	4948
1	10	13237
1	10	256
1	10	29931
1	10	6357
1	10	5446
1	10	22406
1	10	11146
1	10	57629
1	10	3701
1	10	13153
1	10	330
1	10	5414
1	10	39782
1	10	7524
1	10	2587
1	10	1337
1	10	10643
1	10	34129
1	10	15276
1	10	11588
1	10	37784
1	10	44164
1	10	6650
1	10	34611
1	10	13672
1	10	8665
1	10	65411
1	10	70208
1	10	14051
1	10	32778
1	10	54532
1	10	134896
1	11	114301
1	11	90694
1	11	4687
1	11	16580
1	11	52534
1	11	3486
1	11	1585
1	11	52751
1	11	77267
1	11	3134
1	11	15568
1	11	3161
1	11	47176
1	11	217656
1	11	19981
1	11	4855
1	11	7632
1	11	10070
1	11	4643
1	11	11436
1	11	79356
1	11	4199
1	11	70278
1	11	14714
1	11	9909
1	11	6243
1	11	115907
1	11	21654
1	11	15277
1	11	3368
1	11	78638
1	11	18603
1	11	21798
1	11	9309
1	11	15303
1	11	95397
1	11	61336
1	11	9791
1	11	12043
1	11	15716
1	11	138579
1	11	64268
1	11	175773
1	11	68210
1	11	34696
1	11	18405
1	11	172266
1	12	37040
1	12	14248
1	12	7688
1	12	11076
1	12	3065
1	12	661
1	12	2533
1	12	4795
1	12	92938
1	12	10226
1	12	949
1	12	14198
1	12	14671
1	12	54375
1	12	2987
1	12	6586
1	12	7552
1	12	1880
1	12	15669
1	12	2812
1	12	12274
1	12	2558
1	12	13101
1	12	4967
1	12	21775
1	12	4137
1	12	1390
1	12	8216
1	12	76331
1	12	5167
1	12	1376
1	12	2087
1	12	34749
1	12	4211
1	12	3729
1	12	2859
1	12	3662
1	12	2980
1	12	47862
1	12	25110
1	12	19163
1	12	83800
1	12	55334
1	12	29836
1	12	15185
1	12	23820
1	12	4719
1	12	20261
1	13	4136
1	13	8143
1	13	8555
1	13	35537
1	13	30385
1	13	5131
1	13	5403
1	13	13632
1	13	887
1	13	18909
1	13	4151
1	13	13879
1	13	4731
1	13	41191
1	13	1810
1	13	14778
1	13	12544
1	13	6341
1	13	1143
1	13	249
1	13	771
1	13	22210
1	13	45715
1	13	1607
1	13	613
1	13	1846
1	13	13209
1	13	6148
1	13	36341
1	13	3748
1	13	2036
1	13	7945
1	13	2887
1	13	9391
1	13	8483
1	13	63215
1	13	20032
1	13	13636
1	13	4464
1	13	66599
1	13	47066
1	13	19062
1	13	21356
1	13	17600
1	13	10250
1	14	807
1	14	1848
1	14	2684
1	14	2351
1	14	2206
1	14	1356
1	14	658
1	14	5021
1	14	2489
1	14	9498
1	14	2908
1	14	4979
1	14	1008
1	14	8334
1	14	4551
1	14	5673
1	14	4419
1	14	2165
1	14	758
1	14	2897
1	14	4893
1	14	985
1	14	715
1	14	4504
1	14	7118
1	14	1239
1	14	2591
1	14	2697
1	14	1803
1	14	2730
1	14	1671
1	14	2334
1	14	2639
1	14	2522
1	14	2153
1	14	5828
1	15	175767
1	15	110006
1	15	201158
1	15	188882
1	15	2257
1	15	65591
1	15	102976
1	15	6776
1	15	21670
1	15	62507
1	15	30564
1	15	10206
1	15	2920
1	15	17820
1	15	125468
1	15	2169
1	15	36942
1	15	25528
1	15	84155
1	15	29083
1	15	4026
1	15	18184
1	15	3318
1	15	23673
1	15	5486
1	15	1009
1	15	19764
1	15	2816
1	15	1217
1	15	818
1	15	1550
1	15	3518
1	15	6693
1	15	26505
1	15	4339
1	15	43884
1	15	49196
1	15	9510
1	15	2859
1	15	5243
1	15	32717
1	15	15228
1	15	8349
1	15	28064
1	15	7675
1	15	5678
1	15	33799
1	15	75303
1	15	82314
1	15	28106
1	15	7546
1	15	13051
1	15	27113
1	15	133787
1	15	16941
1	15	12694
1	15	81717
1	15	64805
1	15	807074
1	16	204527
1	16	95027
1	16	3765
1	16	75907
1	16	45837
1	16	38679
1	16	4035
1	16	26219
1	16	63756
1	16	21929
1	16	8687
1	16	69989
1	16	10936
1	16	48891
1	16	9287
1	16	87098
1	16	18530
1	16	21327
1	16	2616
1	16	59621
1	16	2513
1	16	136142
1	16	46672
1	16	12910
1	16	7619
1	16	23527
1	16	26514
1	16	27574
1	16	15457
1	16	7653
1	16	13593
1	16	124771
1	16	81288
1	16	9861
1	16	9075
1	16	74214
1	16	15792
1	16	44881
1	16	23572
1	16	72392
1	16	8576
1	16	13294
1	16	4027
1	16	5357
1	16	15922
1	16	23132
1	16	5819
1	16	7522
1	16	55997
1	16	7419
1	16	3005
1	16	30844
1	16	57618
1	16	41046
1	16	12179
1	16	129599
1	16	2473
1	16	29345
1	16	175233
1	16	19600
1	16	25445
1	16	39405
1	16	168302
1	16	11747
1	16	41479
1	16	19245
1	16	1268
1	16	27091
1	16	5708
1	16	89025
1	16	15388
1	16	21571
1	16	271486
1	16	16217
1	16	12243
1	16	7380
1	16	74025
1	16	112627
1	16	13392
1	16	5861
1	16	4338
1	16	19839
1	16	8711
1	16	51419
1	16	56421
1	16	14563
1	16	6388
1	16	7044
1	16	17954
1	16	49864
1	16	22237
1	16	34868
1	16	18669
1	16	28359
1	16	68312
1	16	37325
1	16	41726
1	16	16991
1	16	56158
1	16	141702
1	16	347976
1	16	35448
1	16	42600.5
1	16	42600.5
1	16	35763
1	16	71526
1	16	80874
1	16	14982
1	16	57761
1	16	27496
1	16	100067
1	16	100067
1	16	291132
1	16	291132
1	16	165681
1	16	131891
1	17	29893
1	17	5061
1	17	32480
1	17	1494
1	17	839
1	17	14252
1	17	3358
1	17	1265
1	17	8404
1	17	2278
1	17	855
1	17	1309
1	17	299
1	17	712
1	17	5782
1	17	612
1	17	17435
1	17	628
1	17	2475
1	17	13730
1	17	6691
1	17	532
1	17	5129
1	17	505
1	17	8058
1	17	309
1	17	30535
1	17	962
1	17	23752
1	17	8454
1	17	6071
1	17	5814
1	17	3009
1	17	876
1	17	2475
1	17	2349
1	17	17063
1	17	17232
1	17	5330
1	17	1747
1	17	45477
1	17	12748
1	17	2844
1	17	7524
1	17	805
1	17	5979
1	17	515
1	17	2715
1	17	7464
1	17	40884
1	17	24687
1	17	12108
1	19	10092
1	19	10413
1	19	1650
1	19	8725
1	19	1239
1	19	5762
1	19	3150
1	19	2313
1	19	675
1	19	811
1	19	3582
1	19	699
1	19	1705
1	19	859
1	19	3623
1	19	636
1	19	2352
1	19	2041
1	19	65
1	19	855
1	19	878
1	19	9759
1	19	5723
1	19	689
1	19	1532
1	19	568
1	19	3422
1	19	4220
1	19	5151
1	19	6115
1	19	864
1	19	2587
1	19	8666
1	19	6480
1	20	3894
1	20	2330
1	20	499
1	20	1016
1	20	988
1	20	742
1	20	1221
1	20	3681
1	20	3101
1	20	1509
1	20	806
1	20	5484
1	20	5145
1	20	6612
1	20	4409
1	20	1763
1	20	5738
1	20	5425
1	20	3876
1	20	572
1	20	862
1	20	954
1	20	752
1	20	7181
1	20	622
1	20	8658
1	20	7638
1	20	8087
1	20	616
1	20	5993
1	20	4255
1	20	4261
1	20	2402
1	20	5747
1	20	9347
1	20	9646
1	21	4105
1	21	4483
1	21	6910
1	21	2766
1	21	16915
1	21	1455
1	21	806
1	21	4028
1	21	910
1	21	3024
1	21	298
1	21	3564
1	21	8388
1	21	865
1	21	2386
1	21	706
1	21	5612
1	21	5739
1	21	3429
1	21	9638
1	21	6712
1	21	4273
1	21	3838
1	21	1684
1	21	24716
1	21	3233
1	21	2919
1	21	259
1	21	3910
1	21	3185
1	21	3531
1	21	513
1	21	660
1	21	1262
1	21	7561
1	21	774
1	21	3061
1	21	4014
1	21	1004
1	21	1249
1	21	1111
1	21	4980
1	21	7451
1	21	4690
1	21	4737
1	21	894
1	21	833
1	21	965
1	21	4905
1	21	3377
1	21	9235
1	21	7418
1	21	6901
1	21	8973
1	21	3452
1	21	2814
1	21	12199
1	21	6996
1	22	4642
1	22	12226
1	22	2735
1	22	8117
1	22	492
1	22	702
1	22	13488
1	22	4588
1	22	13257
1	22	3805
1	22	2153
1	22	2327
1	22	4208
1	22	6263
1	22	13197
1	22	1860
1	22	4286
1	22	5333
1	22	9751
1	22	815
1	22	3220
1	22	10091
1	22	1246
1	22	16581
1	22	7586
1	22	7604
1	22	4269
1	22	4688
1	22	4891
1	22	1366
1	22	1148
1	22	544
1	22	15180
1	22	614
1	22	9945
1	22	1234
1	22	614
1	22	10182
1	22	4772
1	22	2128
1	22	4387
1	22	1653
1	22	5989
1	22	12322
1	22	13970
1	22	9400
1	22	5465
1	22	7941
1	22	5742
1	22	2704
1	22	12051
1	22	8376
1	22	8780
1	22	9181
1	22	16366
1	22	8884
1	22	6250
1	22	10338
1	22	11295
1	24	3187
1	24	7172
1	24	4209
1	24	10149
1	24	996
1	24	2219
1	24	709
1	24	1388
1	24	2935
1	24	2042
1	24	1767
1	24	551
1	24	961
1	24	907
1	24	829
1	24	3891
1	24	863
1	24	603
1	24	6674
1	24	1797
1	24	5211
1	24	992
1	24	3585
1	24	23617
1	24	1497
1	24	1891
1	24	2006
1	24	2021
1	24	5414
1	24	1252
1	24	5839
1	24	28101
1	24	3052
1	24	2152
1	24	1535
1	24	699
1	24	21719
1	24	805
1	24	2736
1	24	7093
1	24	1083
1	24	887
1	24	717
1	24	3384
1	24	2576
1	24	6817
1	24	5044
1	24	2936
1	24	5274
1	24	2756
1	24	2438
1	24	862
1	24	3396
1	24	5353
1	24	3576
1	24	8567
1	24	31720
1	24	6143
1	24	13534
1	24	13533
1	24	13375
1	24	5136
1	25	3516
1	25	18180
1	25	613
1	25	1788
1	25	8707
1	25	13847
1	25	13107
1	25	564
1	25	2782
1	25	1723
1	25	4106
1	25	1290
1	25	30072
1	25	12892
1	25	27618
1	25	4097
1	25	13947
1	25	12414
1	25	2552
1	25	10745
1	25	21703
1	25	4360
1	25	2099
1	25	3188
1	25	8357
1	25	7086
1	25	1291
1	25	20003
1	25	4806
1	25	22070
1	25	4075
1	25	2000
1	25	2609
1	25	5593
1	25	3620
1	25	21919
1	25	18394
1	25	13162
1	25	6163
1	25	7307
1	25	8473
1	25	26232.5
1	25	30964.5
1	25	11115
1	25	18190
1	25	44638
1	25	34815
1	25	3549
1	25	76847
1	25	6451
1	25	9960
1	26	8509
1	26	790
1	26	2256
1	26	25604
1	26	11039
1	26	2477
1	26	1163
1	26	11407
1	26	1370
1	26	7280
1	26	5940
1	26	817
1	26	585
1	26	4603
1	26	1086
1	26	877
1	26	2479
1	26	6360
1	26	5126
1	26	773
1	26	2267
1	26	17236
1	26	1385
1	26	6183
1	26	5268
1	26	2518
1	27	5983
1	27	7278
1	27	13885
1	27	14710
1	27	19919
1	27	3615
1	27	652
1	27	2574
1	27	25607
1	27	13676
1	27	8007
1	27	17130
1	27	35467
1	27	16915
1	27	30281
1	27	518
1	27	8644
1	27	13006
1	27	42805
1	27	20523
1	27	5020
1	27	5089
1	27	4184
1	27	26399
1	27	1608
1	27	4065
1	27	12288
1	27	10269
1	27	6533
1	27	2651
1	27	22145
1	27	15824
1	27	10415
1	27	19160
1	27	11494
1	27	32966
1	27	16267
1	27	3158
1	27	5056
1	27	7416
1	27	14221
1	27	9829
1	27	514
1	27	4797
1	27	5719
1	27	36827
1	27	499
1	27	18080
1	27	3759
1	27	4923
1	27	10560
1	27	63136
1	27	26354
1	27	30888
1	27	29472
1	27	88414
1	27	12590
1	27	36810
1	27	31820
1	27	67720
1	27	67720
1	27	13958
1	27	35640
1	27	10644
1	27	21506
1	27	34631
1	27	8409
1	27	18275
1	27	12314
1	27	58240
1	27	79024
1	28	3384
1	28	557
1	28	1879
1	28	4533
1	28	2688
1	28	978
1	28	5217
1	28	1655
1	28	607
1	28	610
1	28	4932
1	28	1272
1	28	899
1	28	1225
1	28	2362
1	28	4576
1	28	1327
1	28	1825
1	28	3495
1	28	5671
1	28	1342
1	28	688
1	28	693
1	28	1390
1	28	1085
1	28	836
1	28	7545
1	28	5080
1	28	5343
1	28	11832
1	29	2557
1	29	2054
1	29	2685
1	29	1651
1	29	577
1	29	3009
1	29	4183
1	29	1736
1	29	945
1	29	546
1	29	612
1	29	4134
1	29	579
1	29	4014
1	29	951
1	29	4896
1	29	4964
1	29	2589
1	29	6048
1	29	3242
1	30	14305
1	30	11558
1	30	4591
1	30	886
1	30	818
1	30	2296
1	30	3305
1	30	4273
1	30	823
1	30	1331
1	30	1155
1	30	10311
1	30	2790
1	30	908
1	30	14734
1	30	2735
1	30	14673
1	30	9098
1	30	568
1	30	1156
1	30	594
1	30	5037
1	30	16888
1	30	1466
1	30	13230
1	30	10578
1	30	9787
1	30	5667
1	30	2777
1	30	5487
1	30	15145
1	30	8226
1	30	7551
1	30	922
1	30	2337
1	30	19528
1	30	16366
1	30	7135
1	30	8534
1	30	926
1	30	11092
1	30	30227
1	30	5647
1	30	7739
1	30	15843
1	30	7090
1	30	11278
1	30	2177
1	30	1802
1	30	10819
1	30	81867
1	30	22559
1	31	18462
1	31	7930
1	31	4221
1	31	139887
1	31	13489
1	31	35842
1	31	12563
1	31	8434
1	31	5629
1	31	25430
1	31	41217
1	31	38944
1	31	13781
1	31	1621
1	31	39352
1	31	18538
1	31	18034
1	31	72193
1	31	30695
1	31	90093
1	31	22332
1	31	21704
1	31	10187
1	31	8315
1	31	15218
1	31	12364
1	31	22955
1	31	41631
1	31	21048
1	31	16043
1	31	18282
1	31	3668
1	31	30139
1	31	10083
1	31	16428
1	31	26205
1	31	10283
1	31	10486
1	31	21921
1	31	7738
1	31	63243
1	31	22186
1	31	26432
1	31	12137
1	31	6851
1	31	36960
1	31	36960
1	31	85322
1	31	85322
1	32	14340
1	32	6142
1	32	1359
1	32	1783
1	32	7242
1	32	5140
1	32	1243
1	32	733
1	32	5375
1	32	1103
1	32	4650
1	32	2074
1	32	1281
1	32	988
1	32	1888
1	32	1027
1	32	3492
1	32	6548
1	32	1217
1	32	2911
1	32	4233
1	32	12298
1	32	673
1	32	3457
1	32	5724
1	32	4810
1	32	1007
1	32	6943
1	32	3341
1	32	2684
1	32	6442
1	32	11777
1	32	706
1	32	2271
1	32	2338
1	32	14518
1	32	5746
1	32	5615
1	33	1477
1	33	3874
1	33	11924
1	33	1430
1	33	9946
1	33	501
1	33	2779
1	33	15481
1	33	532
1	33	534
1	33	1017
1	33	1444
1	33	6715
1	33	3290
1	33	8572
1	33	3631
1	33	1879
1	33	4052
1	33	28288
1	33	11822
1	33	3226
1	33	8214
1	33	4775
1	34	1759
1	34	1858
1	34	907
1	34	1575
1	34	4031
1	34	529
1	34	1081
1	34	4034
1	34	3710
1	34	2047
1	34	945
1	34	1009
1	34	4897
1	34	2367
1	34	1462
1	34	3679
1	34	524
1	34	1679
1	34	858
1	34	1589
1	34	1895
1	34	4355
1	35	1543
1	35	4060
1	35	4475
1	35	1913
1	35	1256
1	35	14855
1	35	1542
1	35	567
1	35	2466
1	35	773
1	35	2651
1	35	325
1	35	3467
1	35	11255
1	35	850
1	35	1656
1	35	7300
1	35	860
1	35	4376
1	35	1172
1	35	121
1	35	2567
1	35	5389
1	35	3167
1	35	3648
1	35	3316
1	35	2091
1	35	10332
1	35	3335
1	35	766
1	35	695
1	35	6591
1	35	2169
1	35	813
1	35	1397
1	35	6674
1	35	7862
1	35	3108
1	35	11072
1	35	3805
1	35	17206
1	35	2066
1	35	911
1	35	6555
1	35	2549
1	35	6228
1	35	11354
1	35	8508
1	35	3017
1	35	9051
1	36	3153
1	36	13501
1	36	2522
1	36	21000
1	36	8192
1	36	2138
1	36	26726
1	36	1776
1	36	33314
1	36	1110
1	36	31686
1	36	1763
1	36	4784
1	36	752
1	36	26185
1	36	35337
1	36	12267
1	36	1015
1	36	74992
1	36	72495
1	36	20438
1	36	98628
1	36	59300
1	36	7054
1	36	11041
1	36	27004
1	36	138412
1	36	3158
1	36	43298
1	36	19038
1	36	2813
1	36	6655
1	36	5410
1	36	14029
1	36	24077
1	36	14090
1	36	65261
1	36	21541
1	36	3355
1	36	10005
1	36	30616
1	36	2884
1	36	4437
1	36	73720
1	36	20152
1	36	26325
1	36	11979
1	36	41284
1	36	14401
1	36	805
1	36	6919
1	36	80267
1	36	26447
1	36	9540
1	36	21463
1	36	28682
1	36	76567
1	36	85595
1	36	62390
1	36	31938
1	36	32402
1	36	34393
1	36	24248
1	36	22038
1	36	33673
1	36	34452
1	36	16657
1	36	29085
1	36	29085
1	37	23731
1	37	11614
1	37	5062
1	37	21662
1	37	4548
1	37	5018
1	37	21324
1	37	21906
1	37	7070
1	37	83632
1	37	1174
1	37	13640
1	37	20799
1	37	4856
1	37	20263
1	37	23530
1	37	2255
1	37	2026
1	37	3544
1	37	8207
1	37	9238
1	37	5295
1	37	43575
1	37	23777
1	37	15092
1	37	2078
1	37	1381
1	37	5928
1	37	33898
1	37	28910
1	37	3535
1	37	4070
1	37	39157
1	37	2374
1	37	13484
1	37	6168
1	37	29816
1	37	2020
1	37	5065
1	37	21447
1	37	8894
1	37	8255
1	37	17199
1	37	2129
1	37	60088
1	37	1935
1	37	19620
1	37	9572
1	37	179868
1	37	108874
1	37	54437
1	37	20665
1	37	63022
1	37	48060
1	37	23840
1	37	6249
1	38	3214
1	38	755
1	38	5149
1	38	1754
1	38	2156
1	38	3852
1	38	760
1	38	3442
1	38	1206
1	38	603
1	38	754
1	38	824
1	38	805
1	38	5100
1	38	730
1	38	2883
1	38	2380
1	38	1442
1	38	840
1	38	682
1	39	20389
1	39	9659
1	39	12193
1	39	2658
1	39	11107
1	39	1610
1	39	19989
1	39	3307
1	39	936
1	39	3261
1	39	13366
1	39	19554
1	39	3202
1	39	4603
1	39	13276
1	39	1588
1	39	12170
1	39	13340
1	39	20310
1	39	60152
1	39	794
1	39	24045
1	39	29150
1	39	2628
1	39	780
1	39	653
1	39	63846
1	39	3031
1	39	3007
1	39	70748
1	39	23768
1	39	18807
1	39	21806
1	39	83532
1	39	75230
1	39	24837
1	39	4187
1	39	98124
1	39	37354
1	39	19752
1	39	29857
1	39	30941
1	40	963
1	40	2547
1	40	1238
1	40	2925
1	40	4600
1	40	1286
1	40	4656
1	40	1547
1	40	1198
1	40	6003
1	40	1293
1	40	2937
1	40	1095
1	40	3976
1	40	1558
1	40	1739
1	40	3840
1	40	5866
1	40	871
1	40	966
1	40	1629
1	40	1383
1	40	968
1	40	8106
1	40	3826
1	40	4654
1	40	12250
1	40	5356
1	40	5260
1	41	6211
1	41	1836
1	41	7139
1	41	7153
1	41	2134
1	41	7155
1	41	2588
1	41	3531
1	41	13208
1	41	1306
1	41	4265
1	41	3696
1	41	3705
1	41	6389
1	41	2065
1	41	4115
1	41	3975
1	41	6156
1	41	1998
1	41	3109
1	41	5272
1	41	987
1	41	2758
1	41	5804
1	41	7134
1	41	4672
1	41	3793
1	41	1098
1	41	2318
1	41	821
1	41	2805
1	41	2093
1	41	513
1	41	2909
1	41	5347
1	41	3579
1	41	1116
1	41	2922
1	41	2332
1	41	3542
1	41	5493
1	42	6145
1	42	27786
1	42	16611
1	42	4043
1	42	6292
1	42	6934
1	42	44425
1	42	2013
1	42	1149
1	42	22044
1	42	1067
1	42	7811
1	42	3618
1	42	6590
1	42	14499
1	42	9150
1	42	3600
1	42	12315
1	42	935
1	42	3388
1	42	1894
1	42	3332
1	42	3806
1	42	604
1	42	4787
1	42	6687
1	42	12584
1	42	23332
1	42	5802
1	42	6699
1	42	4633
1	42	2282
1	42	30094
1	42	10276
1	42	18899
1	42	21954
1	42	1261
1	42	5571
1	42	249
1	42	11116
1	42	8968
1	42	8012
1	42	810
1	42	1714
1	42	1657
1	42	9863
1	42	4195
1	42	9376
1	42	32404
1	42	2962
1	42	5818
1	42	16459
1	42	14984
1	42	1919
1	42	14701
1	42	19289
1	42	11220
1	42	8211
1	42	2939
1	42	2378
1	42	32338
1	42	32338
1	42	12888
1	42	7826
1	42	5465
1	42	5114
1	42	19160
1	42	18182
1	42	9973
1	42	15486
1	42	10079
1	42	9628
1	42	8048
1	43	5667
1	43	57677
1	43	18317
1	43	30443
1	43	8217
1	43	8326
1	43	13153
1	43	38331
1	43	1841
1	43	246
1	43	2306
1	43	8916
1	43	3046
1	43	5292
1	43	1344
1	43	18056
1	43	258
1	43	2215
1	43	6955
1	43	31280
1	43	1251
1	43	5263
1	43	39899
1	43	1848
1	43	7362
1	43	3789
1	43	2162
1	43	33273
1	43	7925
1	43	3401
1	43	36238
1	43	3615
1	43	1438
1	43	3885
1	43	19118
1	43	613
1	43	3895
1	43	1693
1	43	556
1	43	11055
1	43	6103
1	43	17662
1	43	2241
1	43	253
1	43	32946
1	43	3775
1	43	31864
1	43	12264
1	43	7388
1	43	1032
1	43	2019
1	43	4862
1	43	21745
1	43	7588
1	43	45101
1	43	10963
1	43	7582
1	43	29161
1	44	12760
1	44	2191
1	44	20716
1	44	4667
1	44	16500
1	44	2350
1	44	19540
1	44	1849
1	44	9296
1	44	1508
1	44	2649
1	44	7422
1	44	3052
1	44	950
1	44	12162
1	44	11969
1	44	765
1	44	10994
1	44	568
1	44	7433
1	44	4812
1	44	4952
1	44	9933
1	44	14267
1	44	2967
1	44	4471
1	44	828
1	44	1721
1	44	2210
1	44	2443
1	44	4794
1	44	857
1	44	14069
1	44	3905
1	44	1755
1	44	892
1	44	6383
1	44	879
1	44	22109
1	44	6462
1	44	6405
1	44	3731
1	44	13823
1	44	7898
1	44	11611
1	44	5304
1	44	3379.5
1	44	3379.5
1	45	17210
1	45	15279
1	45	2712
1	45	3554
1	45	3427
1	45	2979
1	45	274
1	45	1674
1	45	1731
1	45	248
1	45	8330
1	45	2347
1	45	4832
1	45	287
1	45	3734
1	45	1641
1	45	4298
1	45	2541
1	45	3667
1	45	1682
1	45	4380
1	45	6776
1	45	5021
1	45	5547
1	45	3325
1	45	17758
1	45	247
1	45	2719
1	45	242
1	45	8007
1	45	1306
[truncated: 6,734 more rows]
